# Supplementary material for: An in situ study of thermal crystallization of amorphous calcium phosphates
Source: Royal Society of Chemistry journal article supplement (doi:10.1039/d2cp02352k), 2022-01-01
Supplement: d2cp02352k1.pdf [file d2cp02352k1.pdf]

## Electronic Supplementary Information

### *In situ* study of thermal crystallization of amorphous calcium phosphates

*Lorenzo Degli Esposti<sup>a</sup>, Marco Fosca<sup>b</sup>, Aurélien Canizares<sup>c</sup>, Leire Del Campo<sup>c</sup>, Marco Ortenzi<sup>b</sup>, Alessio Adamiano<sup>a</sup>, Julietta V. Rau<sup>b</sup>, and Michele Iafisco<sup>a,\*</sup>*

<sup>a</sup>Institute of Science and Technology for Ceramics (ISTEC), National Research Council (CNR), Via Granarolo 64, 48018 Faenza (Italy).

<sup>b</sup>Istituto di Struttura della Materia, Consiglio Nazionale delle Ricerche (ISM-CNR), Via del Fosso del Cavaliere, 100 – 00133 Rome, Italy.

<sup>c</sup>CNRS, CEMHTI UPR3079, Univ. Orléans, F-45071 Orléans, France

\*Corresponding author: Dr. Michele Iafisco. E-mail: michele.iafisco@istec.cnr.it. Phone: +39 0546699730

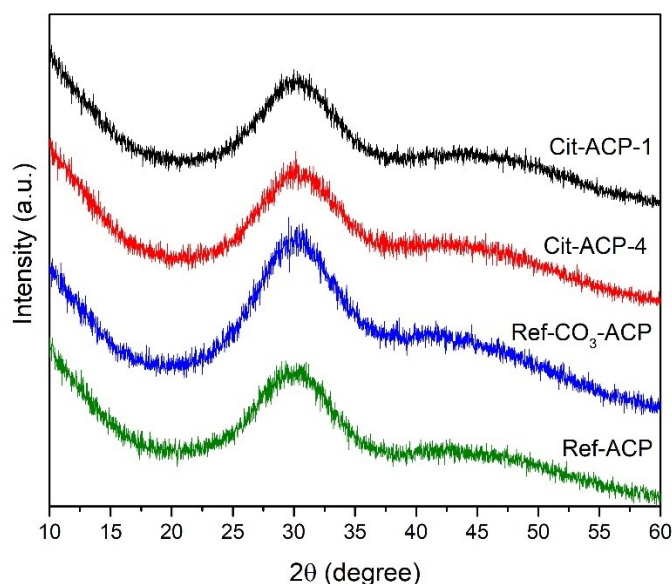

**Supplementary Figure 1.** PXRD patterns of ACP samples.

**Supplementary Table 1.** Chemical composition and specific surface area ( $SSA_{BET}$ ) of ACP samples

| Sample                   | Ca (wt%) <sup>a</sup> | P (wt%) <sup>a</sup> | Citrate (wt%) <sup>b</sup> | Carbonate (wt%) <sup>b</sup> | Ca/P (mol) | $SSA_{BET}$ ( $m^2 g^{-1}$ ) <sup>c</sup> |
|--------------------------|-----------------------|----------------------|----------------------------|------------------------------|------------|-------------------------------------------|
| Cit-ACP-4                | 29.9±0.7*             | 13.6±0.3*            | 1.9±0.2*                   | 3.7±0.4*                     | 1.70±0.02* | 200±20*                                   |
| Cit-ACP-1                | 28.0±0.6*             | 12.7±0.2*            | 1.8±0.2*                   | 3.2±0.3*                     | 1.70±0.04* | 309±31*                                   |
| Ref-ACP                  | 27.5±0.4              | 15.8±0.3             | -                          | 0.3±0.1                      | 1.35±0.01  | 52±5                                      |
| Ref-CO <sub>3</sub> -ACP | 30.0±1.3              | 14.0±0.6             | -                          | 3.4±0.3                      | 1.66±0.01  | 128±13                                    |

<sup>a</sup>Quantified by ICP-OES; <sup>b</sup>Quantified by TGA; <sup>c</sup>Calculated from BET N<sub>2</sub> adsorption. \*Data from Iafisco et al. [1]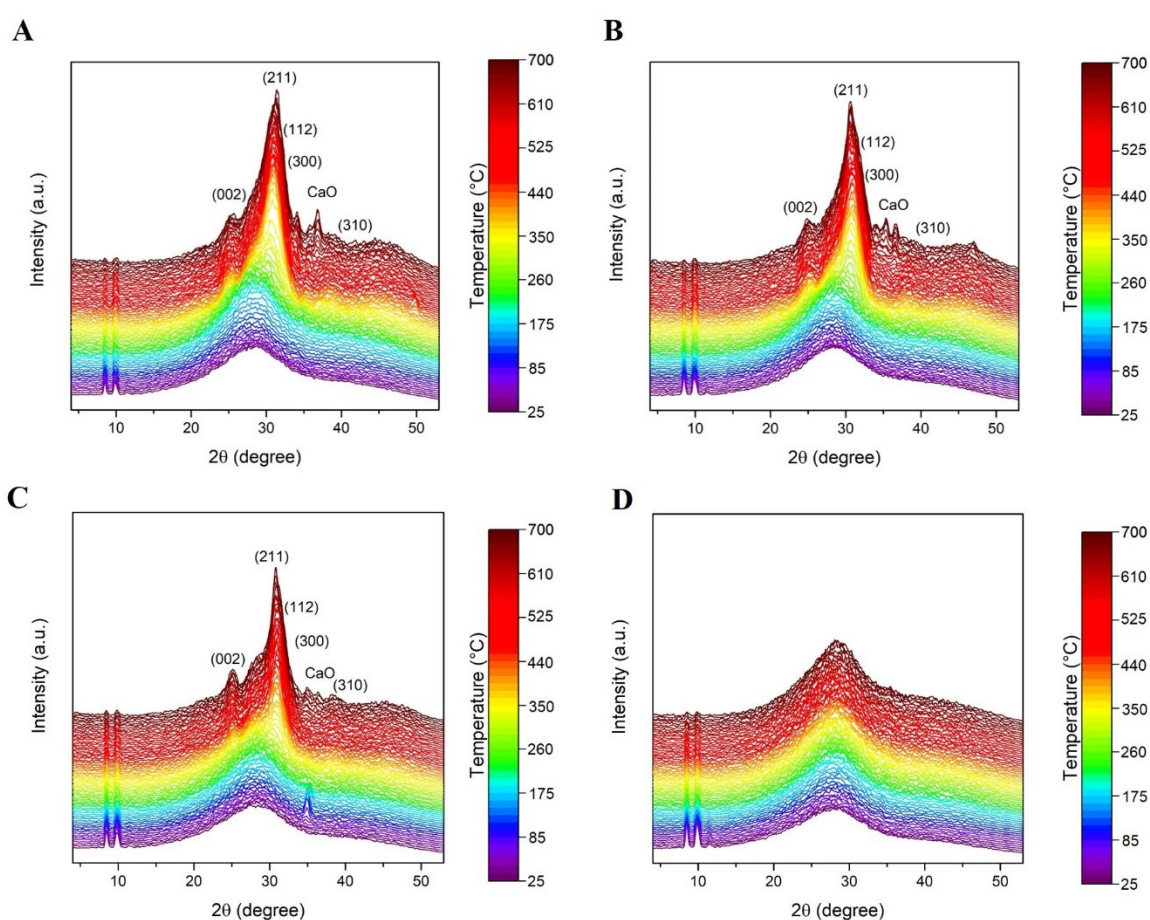**Supplementary Figure 2.** Stack plots of EDXRD patterns, collected as a function of heating temperature of (A) Cit-ACP-1, (B) Cit-ACP-4, (C) Ref-CO<sub>3</sub>-ACP, (D) Ref-ACP. The two peaks at ca. 10° 2θ are due to instrumental contribution and correspond to the anisotropic K<sub>α</sub> and K<sub>β</sub> fluorescence signals of W anode tube.

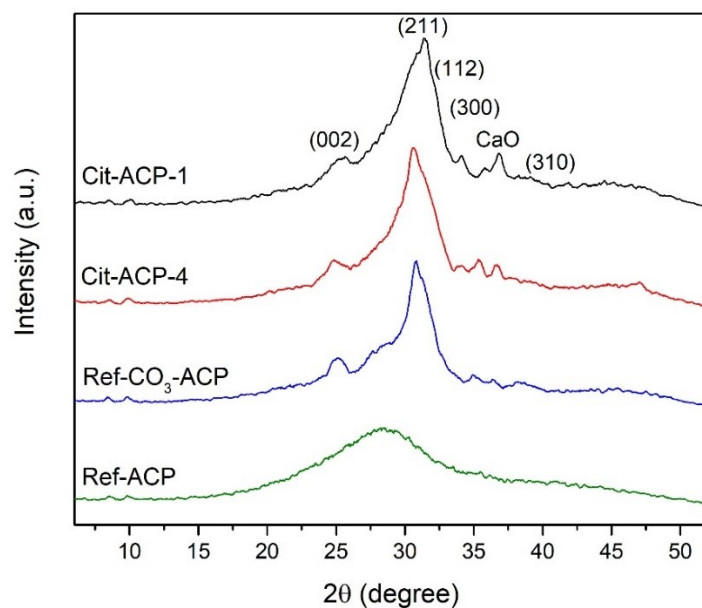

**Supplementary Figure 3.** HT-EDXRD patterns of ACP samples at 700°C. The two small peaks at ca. 10° 2θ are due to instrumental contribution and correspond to the anisotropic  $K_{\alpha}$  and  $K_{\beta}$  fluorescence signals of W anode tube.

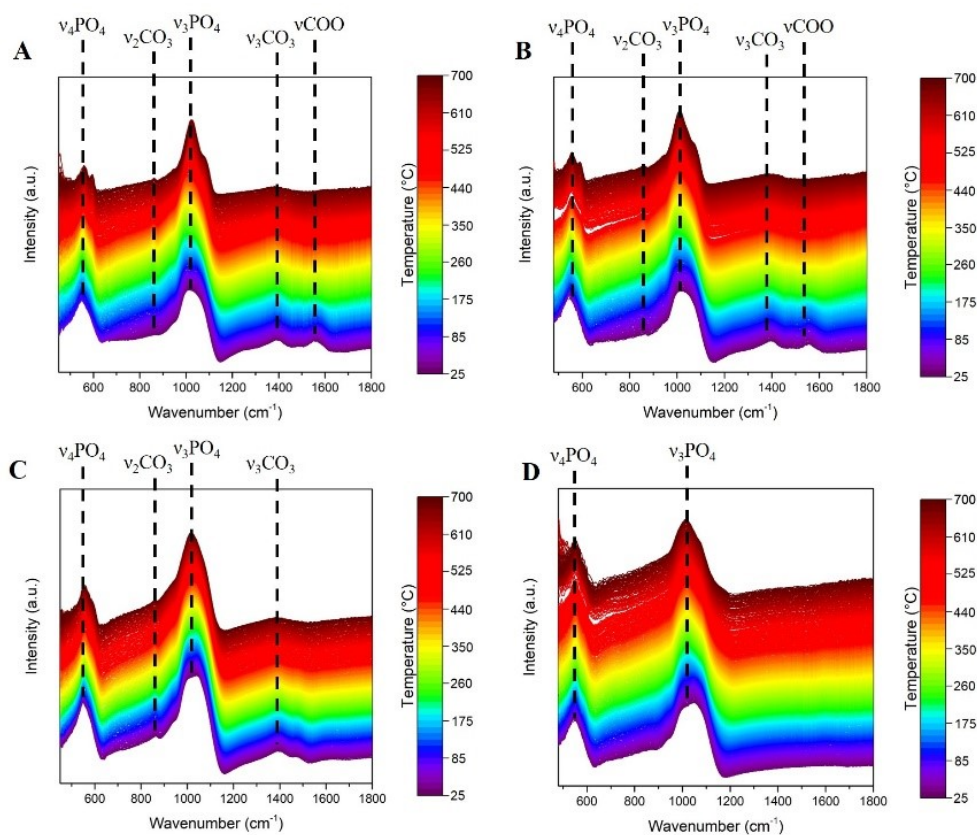

**Supplementary Figure 4.** Stack plot of normalized TD-FTIR spectra, collected as a function of heating temperature of (A) Cit-ACP-1, (B) Cit-ACP-4, (C) Ref-CO<sub>3</sub>-ACP, (D) Ref-ACP.

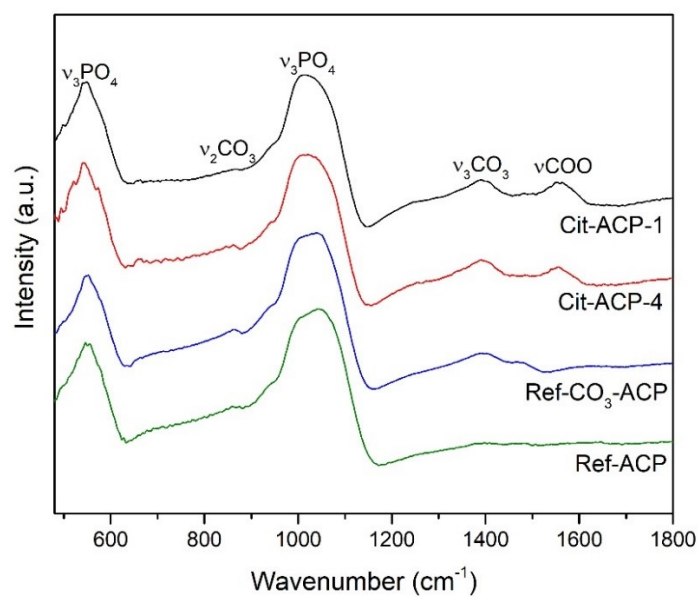

**Supplementary Figure 5.** TD-FTIR spectra of ACP samples at 27°C.

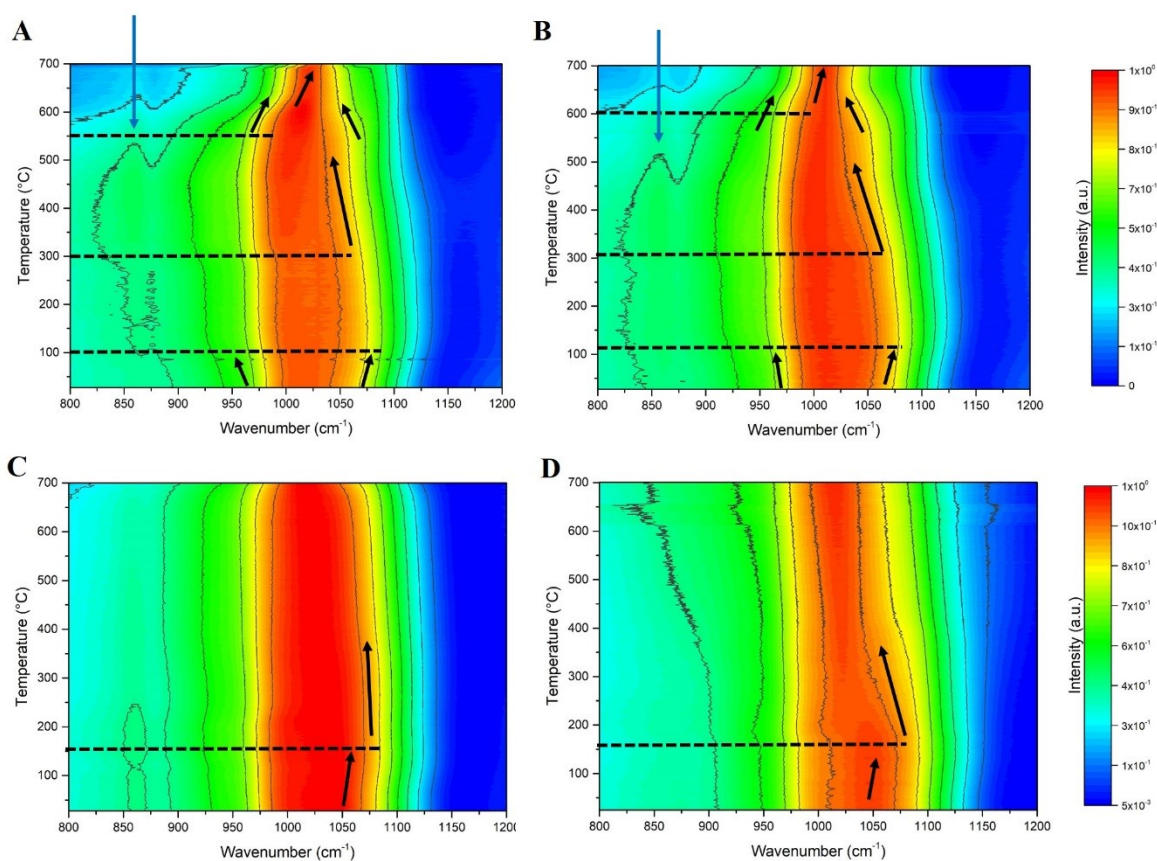

**Supplementary Figure 6.** Enlargement of TD-FTIR contour plots as a function of temperature in the range 800-1200  $\text{cm}^{-1}$  for (A) Cit-ACP-1, (B) Cit-ACP-4, (C) Ref-CO<sub>3</sub>-ACP, and (D) Ref-ACP. The black arrows highlight the peak shifts and change in FWHM. The blue arrows point the 865  $\text{cm}^{-1}$   $\nu_2\text{CO}_3$  peak. The dotted lines highlight initial or final temperatures of peak shifts.

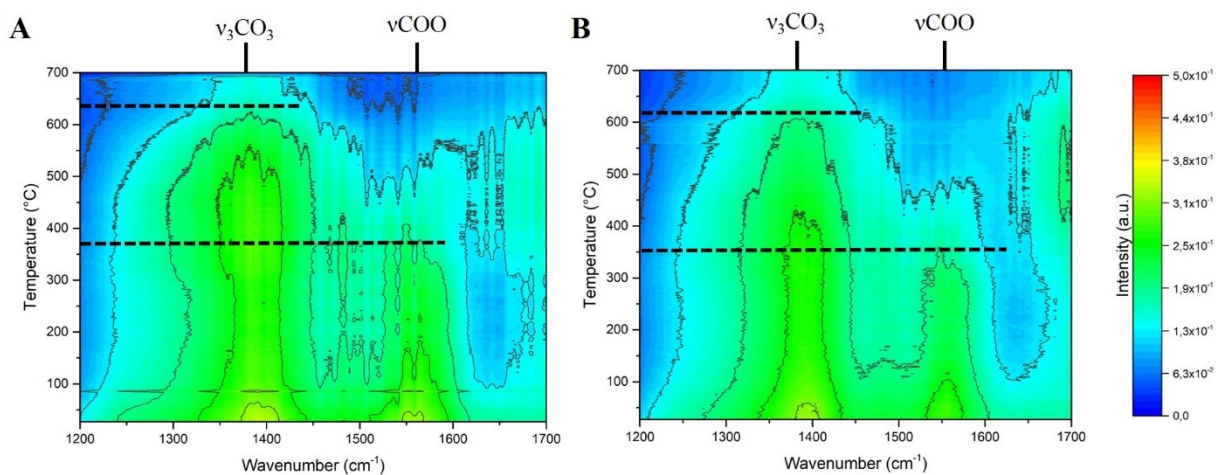

**Supplementary Figure 7.** Enlargement of TD-FTIR contour plots as a function of temperature in the range 1200-1700  $\text{cm}^{-1}$  for (A) Cit-ACP-1, and (B) Cit-ACP-4. The dotted line highlight temperatures of  $\nu_3\text{CO}_3$  and  $\nu\text{COO}$  disappearance.

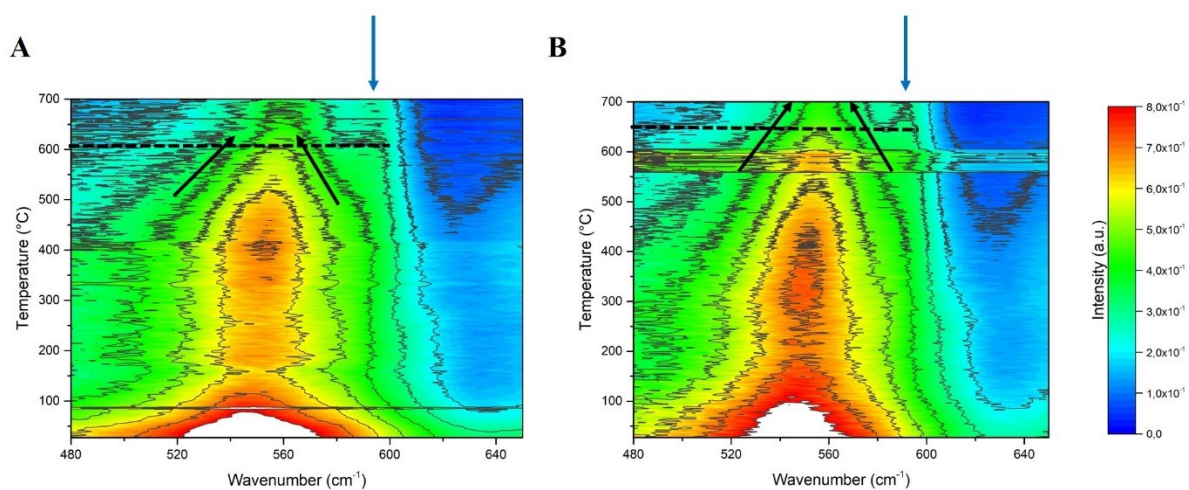

**Supplementary Figure 8.** Enlargement of TD-FTIR contour plots as a function of temperature in the range 480-650 $\text{cm}^{-1}$  for (A) Cit-ACP-1, and (B) Cit-ACP-4. The black arrows highlight the peak shifts and change in FWHM. The blue arrows point the 595  $\text{cm}^{-1}$   $\nu_4\text{PO}_4$  peak. The dotted line highlight the initial temperatures of  $\nu_4\text{PO}_4$  appearance.

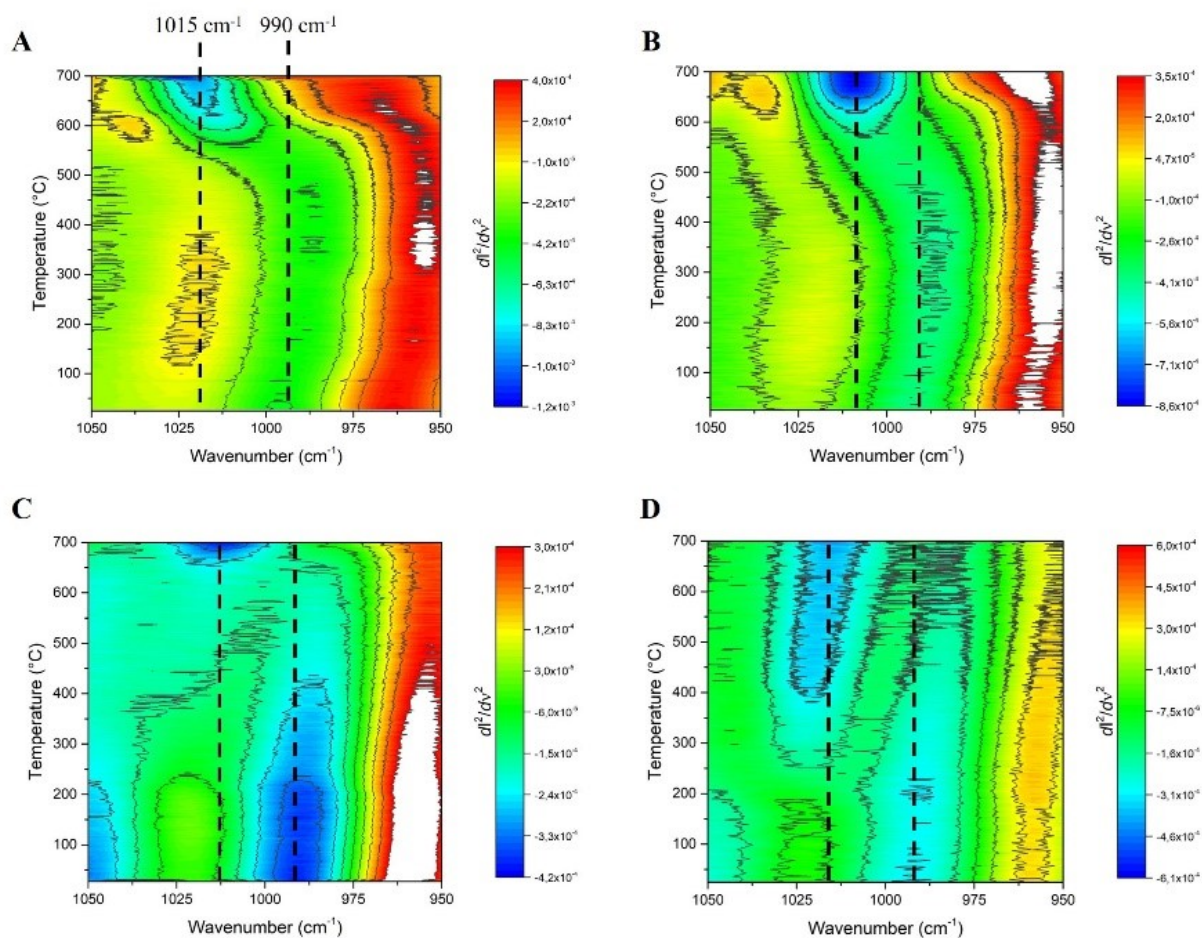

**Supplementary Figure 9.** Enlargement of second derivative of TD-FTIR contour plots as a function of temperature in the range 950-1050 cm<sup>-1</sup> for (A) Cit-ACP-1, and (B) Cit-ACP-4. The dotted lines highlight the negative peaks at 990 and 1015 cm<sup>-1</sup>.

## References

1. Iafisco, M., et al., *Fluoride-doped amorphous calcium phosphate nanoparticles as a promising biomimetic material for dental remineralization*. Scientific Reports, 2018. **8**(1): p. 17016.
